# Supplementary material for: Investigation of the Dual Role of Scorzonera pygmaea: Cytotoxic Activity and Antioxidant Potential
Source: Hindawi journal article supplement (doi:10.1155/2023/2663247), 2023-10-19
Supplement: f1 [file 2663247.f1.pdf]

## SUPPORTING INFORMATION

### Figures

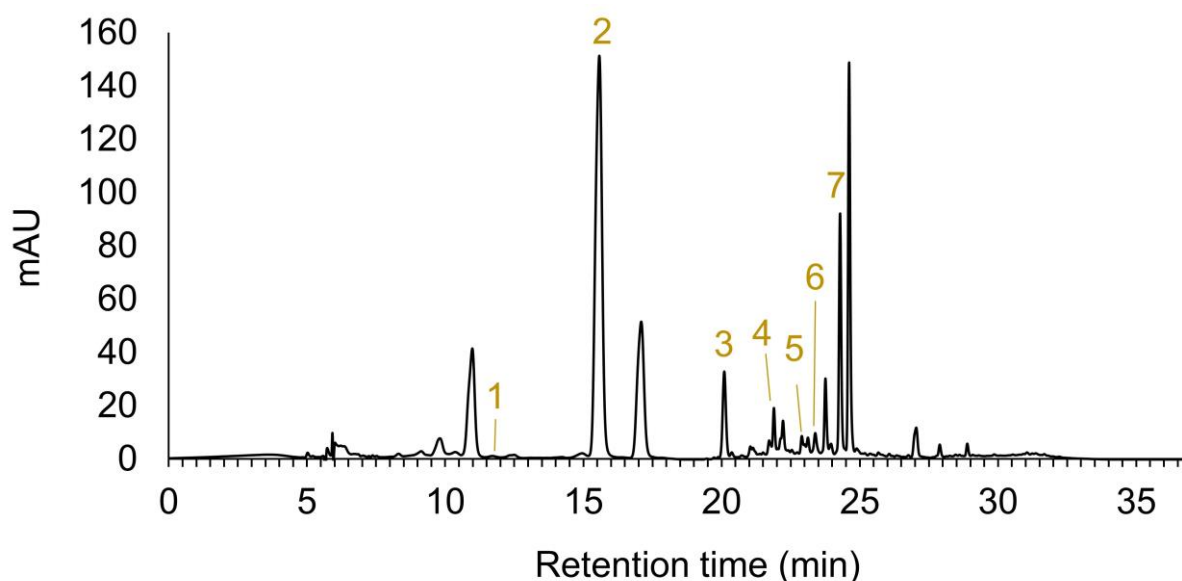

**Figure S1** HPLC chromatogram of phenolic compounds for *S. pygmaea* extract at 320 nm with their retention times. AME: 1-Protocatechuic acid (11.8 min), 2- Chlorogenic acid (15.7 min), 3- Caffeic acid (20.1 min), 4- Rutin (22.0 min), 5- Quercetin 3- $\beta$ -D-glucoside (22.9 min), 6- *p*-Coumaric acid (23.4 min), 7- Ferulic acid (24.3 min).

### Tables

**Table S1** Primer sequences for selected genes. The table provides the primer sequences, lengths, melting temperatures ( $T_m$ ), and GC content (%) used in the qRT-PCR analysis.

| Gene   |   | Primer sequence (5'-3')  | Length | $T_m$ | GC (%) |
|--------|---|--------------------------|--------|-------|--------|
| TP53   | F | GTTTCCGTCTGGGCTTCTT      | 19     | 57.68 | 52.63  |
|        | R | GCAGGTCTTGCCAGTT         | 17     | 56.98 | 58.82  |
| CDKN1A | F | GGAGACTCTCAGGGTCGAAA     | 20     | 58.45 | 55.00  |
|        | R | GCTTCCTCTTGGAGAAGATCAG   | 22     | 58.20 | 50.00  |
| WEE1   | F | CGCCACACAAGACCTTCC       | 18     | 58.34 | 61.11  |
|        | R | GGAGTTTAACAGAGCTGGAATCA  | 23     | 58.42 | 43.48  |
| CCNA2  | F | AGAGGCCGAAGACGAGA        | 17     | 56.73 | 58.82  |
|        | R | AGGCTGTTTACTGTTTGTCTTTC  | 22     | 57.69 | 40.91  |
| CCNB1  | F | TGGTAACAAAGTCAGTGAACAA   | 22     | 56.07 | 36.36  |
|        | R | TTTCCAGTAGCTGAAGGTTT     | 20     | 54.47 | 40.00  |
| CDK1   | F | TCTATTAAGGAACTTCGTCATCCA | 25     | 57.82 | 36.00  |
|        | R | ATCCATGGAAAGAACTCAAAGAT  | 24     | 56.57 | 33.33  |
| CDC25A | F | CAACCTGACCGTCACTATGG     | 20     | 57.99 | 55.00  |
|        | R | CTGCAGATTACTGTTGTCTTCAC  | 24     | 58.32 | 41.67  |
| CDC25C | F | GTCTGTCCAGATGTCCCTAGA    | 21     | 57.98 | 52.38  |
|        | R | GGTAAGCTGAGTGGCAGTTATC   | 22     | 58.80 | 50.00  |
| ACTB   | F | CACTCTTCCAGCCTTCCTTC     | 20     | 57.89 | 55.00  |
|        | R | GTACAGGTCTTTGCGGATGT     | 20     | 57.91 | 50.00  |

**Table S2** PCR reaction mix components and volumes.

| <b>Reaction mix components for a single reaction</b>          | <b>Volume (<math>\mu</math>l)</b> |
|---------------------------------------------------------------|-----------------------------------|
| H <sub>2</sub> O (PCR grade)                                  | 5.8                               |
| Forward primer (F) (from 10 $\mu$ M solution)                 | 0.6                               |
| Reverse primer (R) (from 10 $\mu$ M solution)                 | 0.6                               |
| Enzyme mix (LightCycler <sup>®</sup> 480 SYBR Green I Master) | 10                                |
| cDNA (1:10 diluted)                                           | 3                                 |
| Total reaction volume                                         | 20                                |

**Table S3** PCR Temperature and Duration Conditions.

| <b>Program</b>                                     | <b>Preincubation</b> |          | <b>Amplification</b> |          | <b>Cooling</b> |
|----------------------------------------------------|----------------------|----------|----------------------|----------|----------------|
| <b>Analysis mode</b>                               | -                    |          | Quantification mode  |          | -              |
| <b>Cycle #</b>                                     | 1                    |          | 45                   |          | 1              |
| <b>Target temperature (<math>^{\circ}</math>C)</b> | 95                   | 95       | 57                   | 72       | 4              |
| <b>Period (s)</b>                                  | 00:05:00             | 00:00:10 | 00:00:15             | 00:00:10 | 00:00:30       |
| <b>Ramp rate (<math>^{\circ}</math>C/s)</b>        | 4.8                  | 4.8      | 2.5                  | 4.8      | 2.5            |
